- release metoprolol succinate in patients undergoing non-cardiac surgery (POISE trial): A randomised controlled trial. *Lancet* 2008; 371:1839–47
17. Myles PS, Smith J, Knight J, Cooper DJ, Silbert B, McNeil J, Esmore DS, Buxton B, Krum H, Forbes A, Tonkin A, ATACAS Trial Group: Aspirin and Tranexamic Acid for Coronary Artery Surgery (ATACAS) Trial: Rationale and design. *Am Heart J* 2008; 155:224–30
  18. Myles PS, Leslie K, Peyton P, Paech M, Forbes A, Chan MT, Sessler D, Devereaux PJ, Silbert BS, Jamrozik K, Beattie S, Badner N, Tomlinson J, Wallace S, ANZCA Trials Group: Nitrous oxide and perioperative cardiac morbidity (ENIGMA-II) Trial: Rationale and design. *Am Heart J* 2009; 157:488–94.e1
  19. Montori VM, Permyer-Miranda G, Ferreira-González I, Busse JW, Pacheco-Huergo V, Bryant D, Alonso J, Akl EA, Domingo-Salvany A, Mills E, Wu P, Schünemann HJ, Jaeschke R, Guyatt GH: Validity of composite end points in clinical trials. *BMJ* 2005; 330:594–6
  20. Neaton JD, Gray G, Zuckerman BD, Konstam MA: Key issues in end point selection for heart failure trials: Composite end points. *J Card Fail* 2005; 11:567–75
  21. Myles PS: What's new in trial design: Propensity scores, equivalence, and non-inferiority. *J Extra Corpor Technol* 2009; 41:P6–10
  22. Montori VM, Devereaux PJ, Adhikari NK, Burns KE, Eggert CH, Briel M, Lacchetti C, Leung TW, Darling E, Bryant DM, Bucher HC, Schünemann HJ, Meade MO, Cook DJ, Erwin PJ, Sood A, Sood R, Lo B, Thompson CA, Zhou Q, Mills E, Guyatt GH: Randomized trials stopped early for benefit: A systematic review. *JAMA* 2005; 294:2203–9
  23. Myles PS, Leslie K, Chan MT, Forbes A, Paech MJ, Peyton P, Silbert BS, Pascoe E, ENIGMA Trial Group: Avoidance of nitrous oxide for patients undergoing major surgery: A randomized controlled trial. *ANESTHESIOLOGY* 2007; 107:221–31
  24. Pocock SJ: When (not) to stop a clinical trial for benefit. *JAMA* 2005; 294:2228–30

## ANESTHESIOLOGY REFLECTIONS

### The 1847 Murphy Chloroform Inhaler

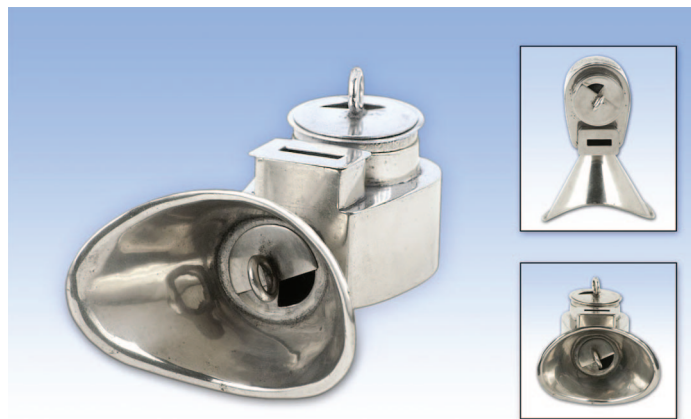

After relocating from Dublin to London in 1840, Edward William Murphy, M.D. (1802–1877), served as University College's Professor of Midwifery (1842–1865). Misdated by many historians, his Murphy Chloroform Inhaler (*see the later model above, courtesy of the Wood Library-Museum*) was actually first used clinically on "the 17th December, 1847" and was even depicted in his 1848 booklet *Chloroform in the Practice of Midwifery* as a chloroform-dampened sponge surrounded by a circular box with a "tin plate . . . interposed, leaving a small fissure" for vapor to pass *via* mouth-piece to the briefly nose-pinch patient. Expirations "passed through an opening in the upper part of the mouth-piece." The professor's interests in obstetric analgesia may have been reinforced by the eight childbirths endured by his wife, a fellow Dubliner whose maiden name, ironically, was "English." (Copyright © the American Society of Anesthesiologists, Inc. This image appears in color in the *Anesthesiology Reflections* online collection available at [www.anesthesiology.org](http://www.anesthesiology.org).)

George S. Bause, M.D., M.P.H., Honorary Curator, ASA's Wood Library-Museum of Anesthesiology, Park Ridge, Illinois, and Clinical Associate Professor, Case Western Reserve University, Cleveland, Ohio. [UJYC@aol.com](mailto:UJYC@aol.com).
